# Supplementary material for: JMJD6 in tumor-associated macrophage regulates macrophage polarization and cancer progression via STAT3/IL-10 axis
Source: PubMed Central journal article supplement (PMC10491492; doi:10.1038/s41388-023-02781-9), 2023-08-11
Supplement: 41388_2023_2781_MOESM2_ESM.pdf [file 41388_2023_2781_MOESM2_ESM.pdf]

# Supplementary Figure 1.

a

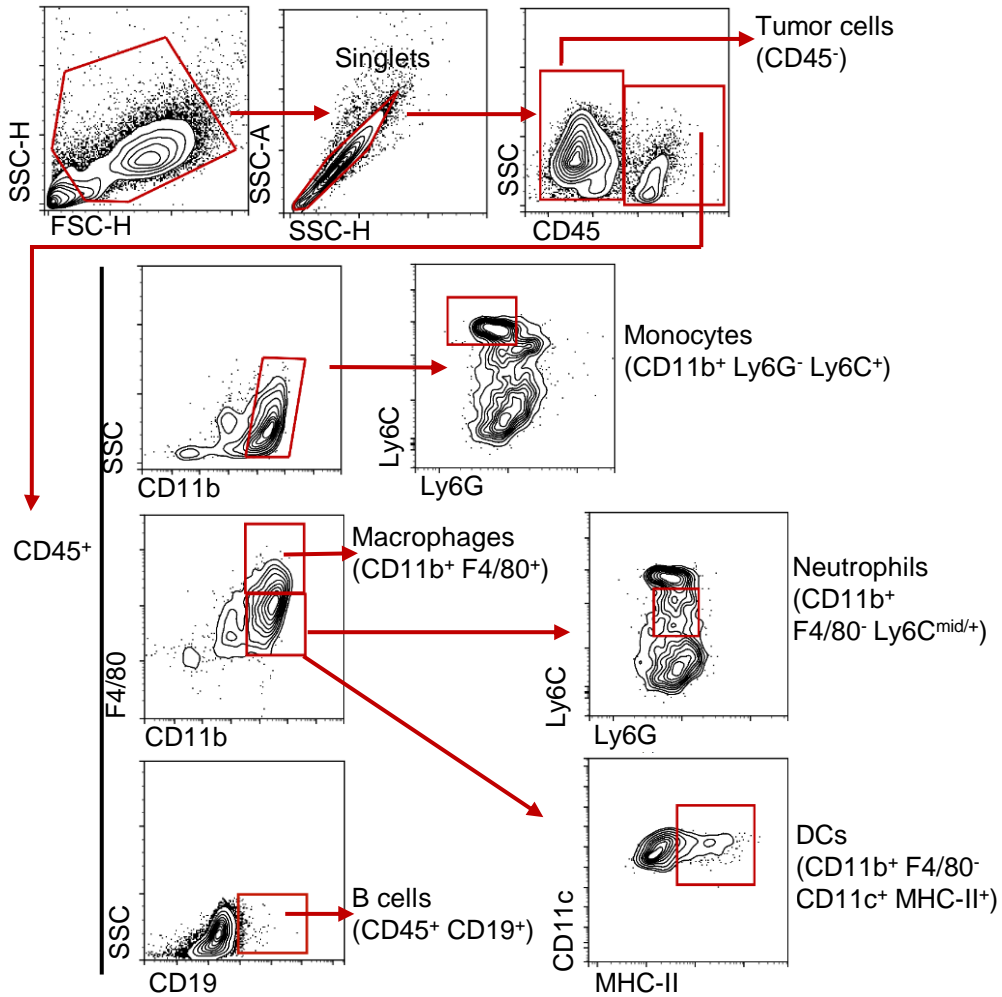

b

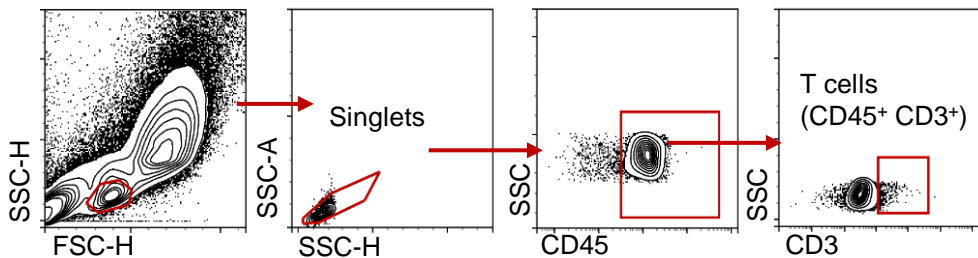

# Supplementary Figure 1.

C

Gate from CD45<sup>+</sup>

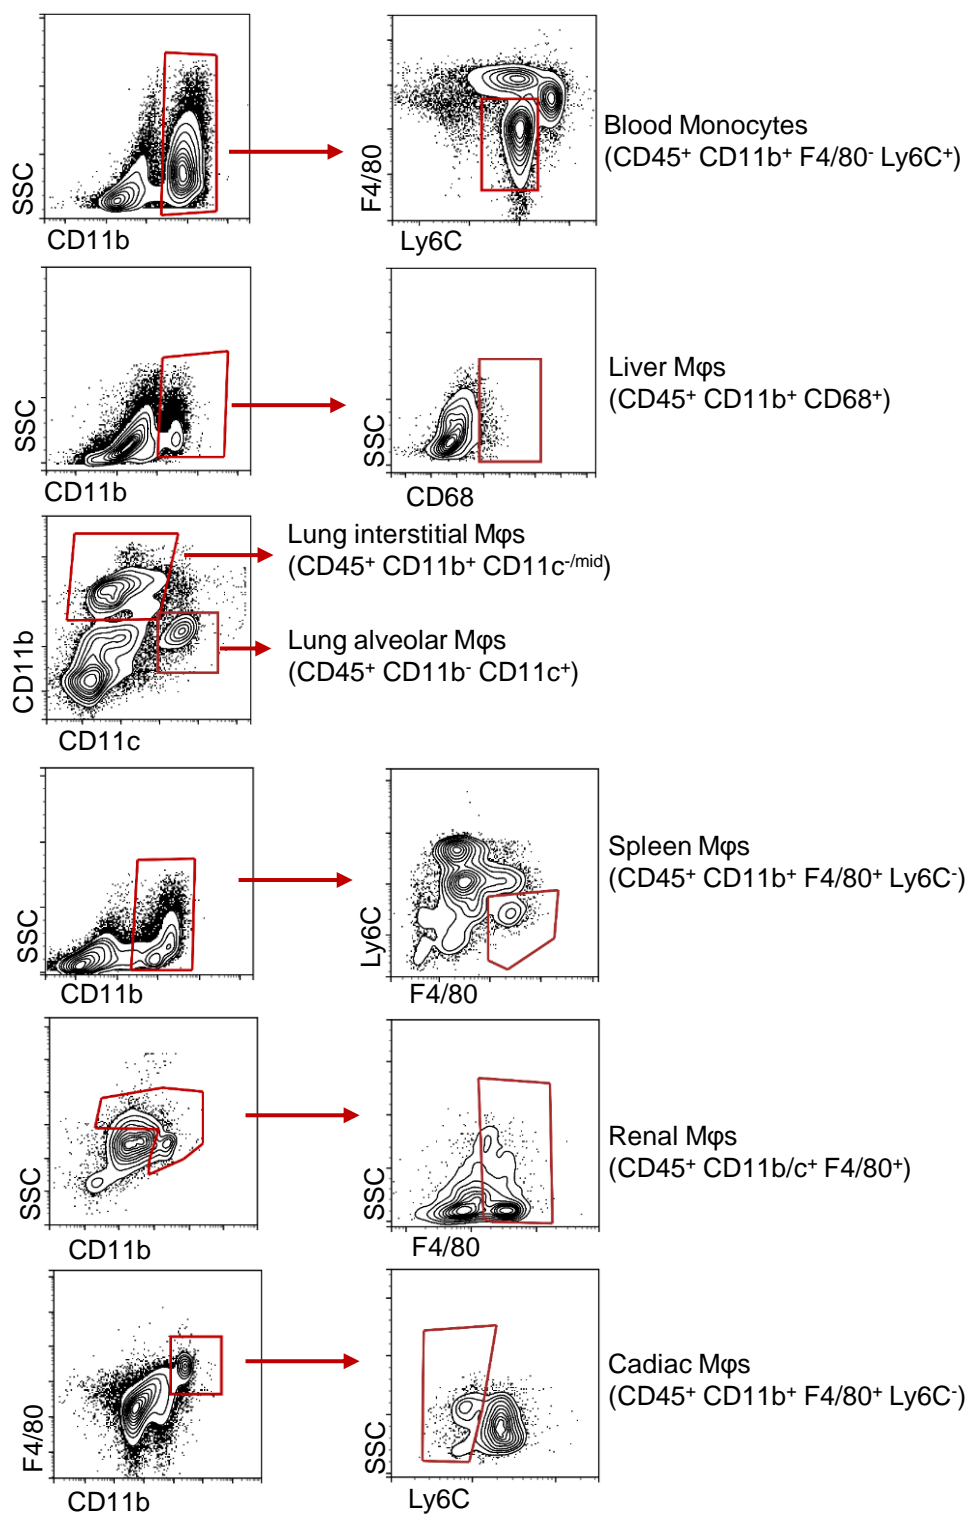

# Supplementary Figure 2.

a

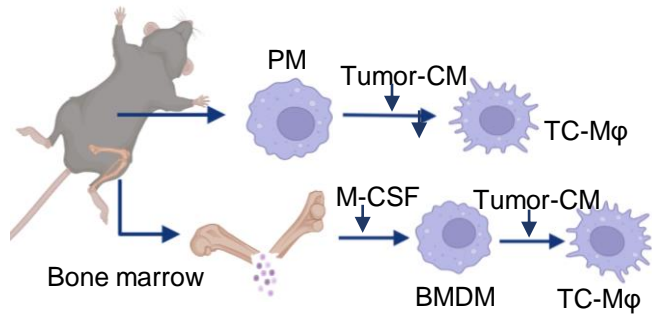

b

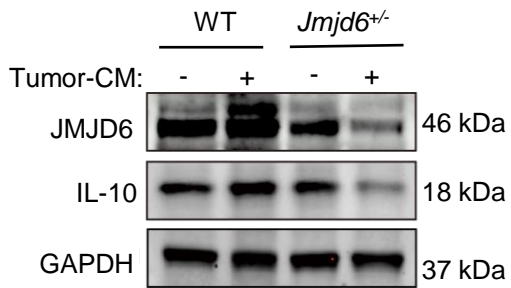

# Supplementary Figure 3.

a

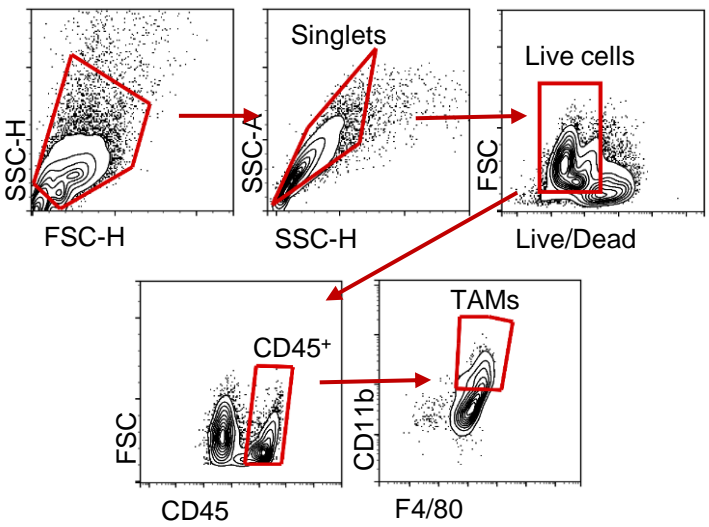

b

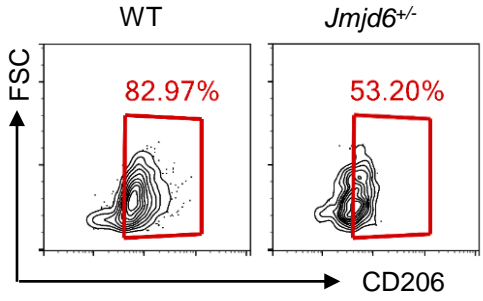

# Supplementary Figure 4.

a

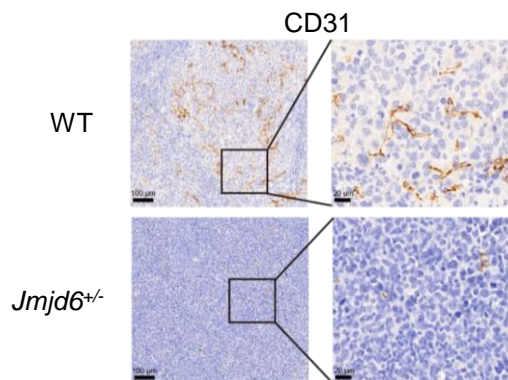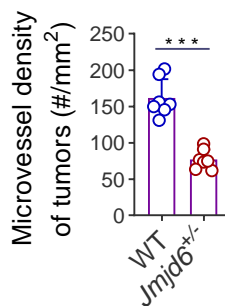

b

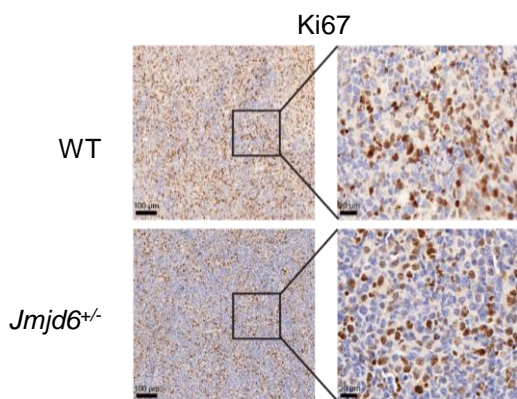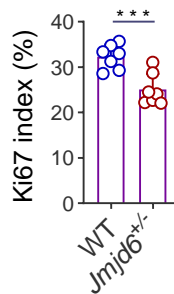

# Supplementary Figure 5.

a

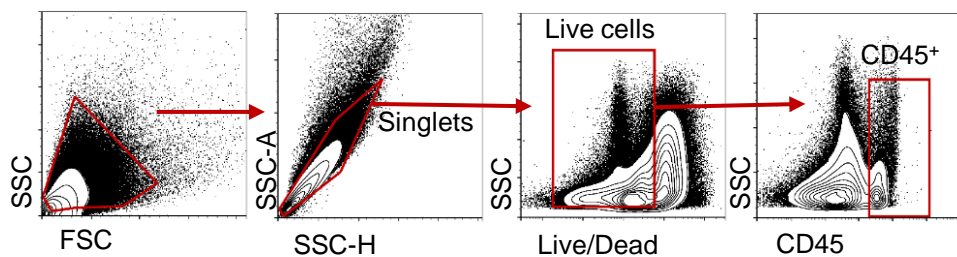

b

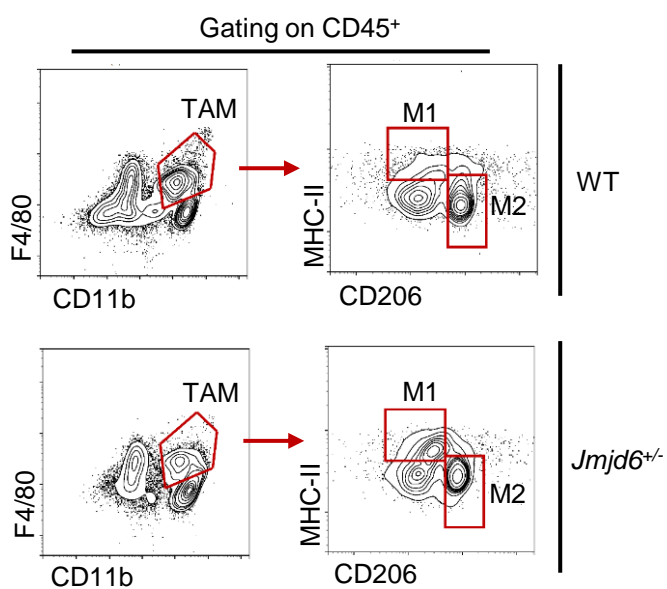

c

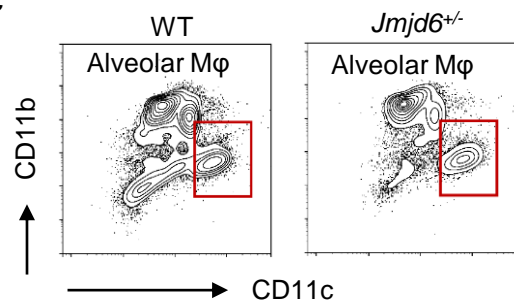

d

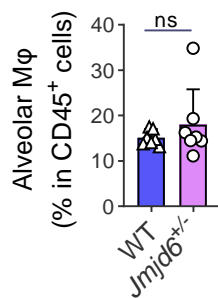

# Supplementary Figure 6

a

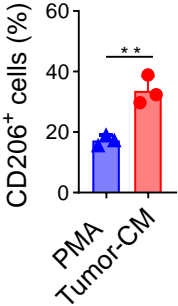

b

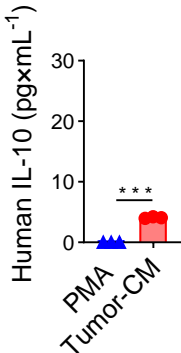

c

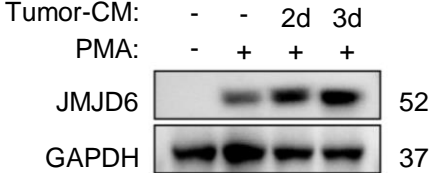

# Supplementary Figure 7.

a

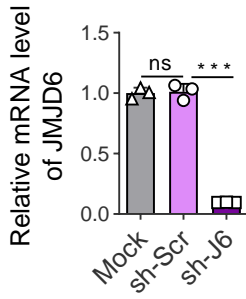

b

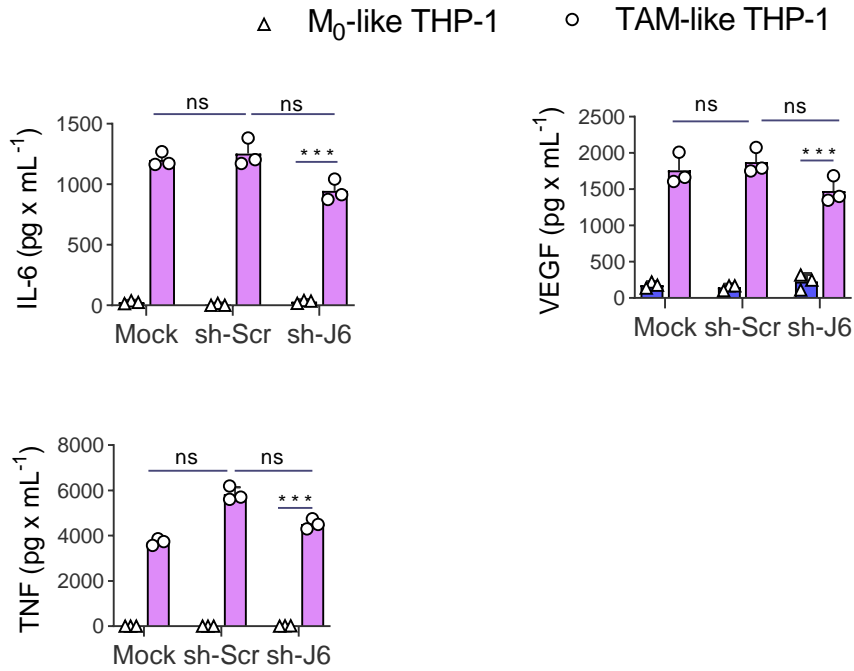

c

| DEG Set        | DEG Number | up-regulated | down-regulated |
|----------------|------------|--------------|----------------|
| sh-J6 vs Mock  | 2765       | 1858         | 907            |
| sh-Scr vs Mock | 1798       | 1227         | 571            |
